# Supplementary material
Source: ML conference proceedings conference paper supplement (https://openaccess.thecvf.com/content/ICCV2023/html/Hwang_FaceCLIPNeRF_Text-driven_3D_ICCV_2023_paper.html)
Supplement: Supplementary file 2 [file Hwang_FaceCLIPNeRF_Text-driven_3D_ICCV_2023_supplemental.zip]

Archive with 2 entries (2 files):
- 06813-supp/06813_supplements.pdf
- 06813-supp/demo.mp4
